# Supplementary material
Source: PubMed Central journal article supplement (PMC7031049)
Supplement: NIHMS1545263-supplement-2.pdf [file NIHMS1545263-supplement-2.pdf]

## Journal of Hepatology

### CTAT methods

Tables for a “Complete, Transparent, Accurate and Timely account” (CTAT) are now mandatory for all revised submissions. The aim is to enhance the reproducibility of methods.

- Only include the parts relevant to your study
- Refer to the CTAT in the main text as ‘Supplementary CTAT Table’
- Do not add subheadings
- Add as many rows as needed to include all information
- Only include one item per row

**If the CTAT form is not relevant to your study, please outline the reasons why:**

|  |
|--|
|  |
|--|

#### 1.1 Antibodies

| Name | Citation | Supplier | Cat no. | Clone no. |
|------|----------|----------|---------|-----------|
|      |          |          |         |           |

#### 1.2 Cell lines

| Name  | Citation                                           | Supplier | Cat no. | Passage no. | Authentication test method |
|-------|----------------------------------------------------|----------|---------|-------------|----------------------------|
| AML12 | Proc Natl Acad Sci U S A.2019;116(30):15184-15193. |          |         |             |                            |

#### 1.3 Organisms

| Name  | Citation                              | Supplier      | Strain                                                    | Sex  | Age     | Overall n number |
|-------|---------------------------------------|---------------|-----------------------------------------------------------|------|---------|------------------|
| Mouse |                                       | Charles River | C57BL/6                                                   | male | 9 weeks | 234              |
| Mouse | J Clin Invest. 2017;127(7):2829-2841. |               | <i>Clec7a</i> <sup>-/-</sup> mice on a C57BL/6 background | male | 6 weeks | 4                |

#### 1.4 Sequence based reagents

| Name | Sequence | Supplier |
|------|----------|----------|
|      |          |          |

#### 1.5 Biological samples

| Description         | Source            | Identifier         |
|---------------------|-------------------|--------------------|
| Human fecal samples | InTeam Consortium | ClinicalTrials.gov |

|                            |                   |                                                         |
|----------------------------|-------------------|---------------------------------------------------------|
|                            |                   | identifier number:<br>NCT02075918                       |
| <b>Human serum samples</b> | InTeam Consortium | ClinicalTrials.gov<br>identifier number:<br>NCT02075918 |

## 1.6 Deposited data

| Name of repository | Identifier | Link |
|--------------------|------------|------|
|                    |            |      |

## 1.7 Software

| Software name  | Manufacturer | Version |
|----------------|--------------|---------|
| GraphPad Prism | GraphPad     | V.6.01  |
| R              |              | V.3.5.1 |

## 1.8 Other (e.g. drugs, proteins, vectors etc.)

|                                           |                                               |                  |
|-------------------------------------------|-----------------------------------------------|------------------|
| Candidalysin                              | Supplied by Selene Mogavero and Bernhard Hube | 0.6uM, 3uM, 15uM |
| clodronate liposomes                      | Vrije Universiteit, Amsterdam, Netherlands    | 200 µl, 5 mg/ml  |
| fluorescein isothiocyanate (FITC)-dextran | Sigma                                         | 200µl,100mg/ml   |
| yeast extract                             | Thermo Fisher Scientific                      | 1%               |
| Peptone                                   | Fisher BD                                     | 2%               |
| D-glucose                                 | Sigma-Aldrich                                 | 2%               |
| Agar                                      | CoreBio(Invitrogen)                           | 1.5%             |
| Gentamicin                                | Sigma                                         | 100 µg/ml        |
| chloramphenicol                           | Sigma                                         | 100 µg/ml        |
| DMEM-F12                                  | Thermo Fisher Scientific                      |                  |
| insulin-transferrin-selenium              | Thermo Fisher Scientific                      | 1%               |
| Dexamethasone                             | MP Biomedicals                                | 40 ng/ml         |
| fetal bovine serum                        | Gemini Bio-Products                           | 10%              |
| antibiotic-antimycotic mix                | CoreBio                                       | 1%               |
| siRNA for mouse TLR2(set of 4 siRNAs)     | Dharmacon                                     | 25nM             |
| siRNA for mouse TLR4(set of 4 siRNAs)     | Dharmacon                                     | 25nM             |
| siGLO Green Transfection Indicator        | Dharmacon                                     | 25nM             |
| Lipofectamine 2000                        | Invitrogen, USA                               |                  |
| Infinity ALT kit                          | Thermo Scientific                             |                  |
| Triglyceride Liquid Reagents Kit          | Pointe Scientific                             |                  |

|                                                               |                          |           |
|---------------------------------------------------------------|--------------------------|-----------|
| Ethanol Assay Kit                                             | BioVision                |           |
| the iFABP ELISA kit                                           | MyBioSource              |           |
| Human Zonulin ELISA Kit                                       | MyBioSource              |           |
| Oil Red O                                                     | Sigma-Aldrich            |           |
| Pierce lactate dehydrogenase (LDH) Cytotoxicity Detection Kit | Thermo Fisher Scientific |           |
| 3-(4,5-dimethylthiazol-2-yl)-2,5'-diphenyltetrazolium bromide | Sigma-Aldrich            | 0.3 mg/ml |
| dimethyl sulfoxide                                            | Sigma-Aldrich            |           |

**1.9 Please provide the details of the corresponding methods author for the manuscript:**

**Correspondence:** Bernd Schnabl, M.D., Department of Medicine, University of California San Diego, MC0063, 9500 Gilman Drive, La Jolla, CA 92093, Phone 858-822-5311, Fax 858-822-5370, Email [beschnabl@ucsd.edu](mailto:beschnabl@ucsd.edu)

**2.0 Please confirm for randomised controlled trials all versions of the clinical protocol are included in the submission. These will be published online as supplementary information.**

|  |
|--|
|  |
|--|
